# Supplementary material for: Brief Communication: Representation of heat conduction into the ice in marine ice shelf melt modeling
Source: Copernicus journal article supplement (doi:10.5194/egusphere-2024-2239), 2024-08-12
Supplement: Supplementary file [file egusphere-2024-2239-AC1-supplement.pdf]

## Authors Response to Review 1 of “Brief Communication: Representation of heat conduction into the ice in marine ice shelf melt modeling”

RC = Reviewer Comment; AR = Author Response

RC: *“This manuscript reviews the different ways in modelling studies for estimation of heat conduction into the ice, and figures out that Holland and Jenkins (1999) best capture the variety of temperature profiles measured in boreholes. Overall, this is a well-written manuscript, however, there are several typos in the manuscript.”*

AR: We thank the reviewer for taking the time to read our manuscript. We are happy that the reviewer enjoyed it and found it well-written. We will correct the typos:

1. RC: *“Line 24, “solution of the thee-equation”, typo.”*  
AR: We will correct the typo (“three-equation”)
2. *Line 63, “temperature profiles found in Antarctic”, typo.*  
AR: We will correct the typo (“...found in Antarctica”)
3. *Line 100, “The Domain”, typo.*  
AR: We will correct the typo (“The domain”)
